# Supplementary material for: Adapting Agriculture to Climate Change: A Synopsis of Coordinated National Crop Wild Relative Seed Collecting Programs across Five Continents
Source: MDPI journal article supplement (doi:10.3390/plants11141840), 2022-07-13
Supplement: s1 [file s1]

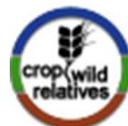

## CWR Project Field Data Form

|                                                                               |                                                     |                                                                                            |                                                                                            |                                                                                                              |                                                                                             |                                                                                                 |
|-------------------------------------------------------------------------------|-----------------------------------------------------|--------------------------------------------------------------------------------------------|--------------------------------------------------------------------------------------------|--------------------------------------------------------------------------------------------------------------|---------------------------------------------------------------------------------------------|-------------------------------------------------------------------------------------------------|
| Collection Number                                                             |                                                     | Collection date                                                                            |                                                                                            | Accession ID                                                                                                 |                                                                                             |                                                                                                 |
| Main collector surname, first name                                            |                                                     |                                                                                            | Institution (CAPITALS)                                                                     |                                                                                                              |                                                                                             |                                                                                                 |
| Other collectors names                                                        |                                                     |                                                                                            | Institutions                                                                               |                                                                                                              |                                                                                             |                                                                                                 |
| Family                                                                        | Genus                                               | Species                                                                                    | Subsp. Var.                                                                                |                                                                                                              |                                                                                             |                                                                                                 |
| Vernacular name(s) (+ language)                                               |                                                     |                                                                                            |                                                                                            |                                                                                                              |                                                                                             |                                                                                                 |
| Photograph IDs or reference numbers                                           |                                                     |                                                                                            |                                                                                            |                                                                                                              |                                                                                             |                                                                                                 |
| Herbarium voucher                                                             | Yes/No Number:                                      | Number of mature plants found                                                              | Number of plants sampled                                                                   | Sampling method                                                                                              | Seeds / fruits collected from ground?                                                       | Phenology status                                                                                |
| Soil sample                                                                   | Yes/No Number:                                      | 1000+<br>100-999<br>50-99<br>25-99<br>10-24<br>5-9<br>2-4<br>1<br>If counted actual number | 1000+<br>100-999<br>50-99<br>25-99<br>10-24<br>5-9<br>2-4<br>1<br>If counted actual number | Random<br>Regular<br>Transect (linear)<br>Core of population<br>Edge of population<br>Other                  | Yes No Partially<br><br>Population distribution<br><br>Single plant<br>Patchy<br>Continuous | More flowers than fruits<br>More fruits than flowers<br>Only fruits<br>Fruits already dispersed |
| Sampling area (m x m)                                                         |                                                     |                                                                                            |                                                                                            |                                                                                                              |                                                                                             |                                                                                                 |
| Country                                                                       |                                                     | Primary subdivision                                                                        |                                                                                            |                                                                                                              |                                                                                             |                                                                                                 |
| Secondary subdivision                                                         |                                                     | Tertiary subdivision                                                                       |                                                                                            |                                                                                                              |                                                                                             |                                                                                                 |
| Local area                                                                    |                                                     | Locality (including distance and direction from nearest village)                           |                                                                                            |                                                                                                              |                                                                                             |                                                                                                 |
| Latitude                                                                      |                                                     | Longitude                                                                                  |                                                                                            |                                                                                                              |                                                                                             | Units<br>Degrees<br>Meters                                                                      |
| Altitude (m)                                                                  |                                                     | Altitude accuracy (m)                                                                      |                                                                                            | Water depth (m)                                                                                              |                                                                                             |                                                                                                 |
| Status                                                                        | Lat/Long method                                     | Altitude method                                                                            | Prevalent aspect                                                                           | Slope                                                                                                        | Soil texture                                                                                | Soil pH                                                                                         |
| Weedy<br>Cultivated<br>Wild                                                   | GPS<br>(Datum _____)<br>DGPS<br>Map<br>Google Earth | Altimeter<br>DEM<br>GPS<br>Estimate<br>Map                                                 | N<br>N-E<br>E<br>S-E<br>S<br>S-W<br>W<br>N-W                                               | _____ ° or<br>Level 0-20 °<br>Undulating<br>20-40 °<br>Rolling 40-70 °<br>Moderate<br>70-90 °<br>Steep >90 ° | Gravel<br>Sand<br>Sandy loam<br>Loam<br>Clay loam<br>Clay<br>Peat<br>No soil                | Acidic<br>Alkaline<br>Neutral<br><br>Saline<br>Yes<br>Not                                       |
| Native<br>Introduced<br>Naturalised                                           |                                                     |                                                                                            |                                                                                            |                                                                                                              |                                                                                             |                                                                                                 |
| Land use                                                                      |                                                     |                                                                                            |                                                                                            | Threats observed                                                                                             |                                                                                             |                                                                                                 |
| Habitat and Site Notes (microhabitat details, distance to agricultural crops) |                                                     |                                                                                            |                                                                                            | Use (medicine, firewood, food etc.)                                                                          |                                                                                             |                                                                                                 |
| Collecting Notes (e.g. problems encountered)                                  |                                                     |                                                                                            |                                                                                            | Associated species                                                                                           |                                                                                             |                                                                                                 |
| Plant Form                                                                    |                                                     |                                                                                            |                                                                                            | Plant Height (m)                                                                                             |                                                                                             |                                                                                                 |
| Plant Description (e.g. scents, flower colour, regeneration)                  |                                                     |                                                                                            |                                                                                            |                                                                                                              |                                                                                             |                                                                                                 |
